# Supplementary material
Source: publisher figshare collection journal article supplement (https://gsapubs.figshare.com/articles/dataset/_/22251076)
Supplement: Supplementary file 1 [file 1]

An, Y., Li, S.M., Zhu, D.C., Cawood, P.A., Wang, Q., Xie, J.C., Zhang, L.L., and Zhao, Z., 2023, Compositional change from high-Mg to low-Mg magmatism at ca. 150 Ma in the central Lhasa terrane, Tibet: Switching from advancing to retreating subduction of the Bangong Tethys slab: GSA Bulletin, <https://doi.org/10.1130/B36719.1>.

## Supplemental Material

**Supplemental Text S1.** Analytical Methods.

**Table S1.** LA-ICP-MS zircon trace element results for intrusive rocks from the Zhegu, Wengmunong, and Dulu plutons in the central Lhasa subterrane.

**Table S2.** LA-ICP-MS zircon U-Pb dating results for intrusive rocks from the Zhegu, Wengmunong, and Dulu plutons in the central Lhasa subterrane.

**Table S3.** In-situ zircon Hf isotopes analyzed by LA-MC-ICP-MS for intrusive rocks from the Zhegu, Wengmunong, and Dulu plutons in the central Lhasa subterrane.

**Table S4.** Whole-rock major and trace element concentrations for intrusive rocks from the Zhegu, Wengmunong, and Dulu plutons in the central Lhasa subterrane, and for duplicate samples and measured USGS standards.

**Table S5.** Compiled GPS positions and zircon U-Pb age data of the magmatic rocks from the central and southern Lhasa subterrane.

**Table S6.** Compiled GPS positions and detrital zircon U-Pb age and Hf isotopic data of sedimentary rocks from Mesozoic strata in the central and southern Lhasa subterrane.

**Figure S1.** Whole-rock TiO<sub>2</sub>, Al<sub>2</sub>O<sub>3</sub>, TFe<sub>2</sub>O<sub>3</sub>, MgO, CaO, and Na<sub>2</sub>O versus SiO<sub>2</sub> diagrams (A–F) for intrusive rocks from the Zhegu, Wengmunong, and Dulu plutons in the central Lhasa subterrane.

**Figure S2.** (A) Whole-rock  $\epsilon$ Nd(t) and (B) whole-rock (87Sr/86Sr)<sub>i</sub> versus zircon U-Pb age diagrams for Middle Jurassic-Early Cretaceous igneous rocks in the central Lhasa subterrane.

**Figure S3.** Ba/Th versus La/Sm (A) and Zr and Ba versus SiO<sub>2</sub> (B–C) diagrams for Middle-Late Jurassic igneous rocks in the central Lhasa subterrane.

Yu An, Shi-Min Li\*, Di-Cheng Zhu\*, Peter A. Cawood, Qing Wang, Jin-Cheng Xie,  
Liang-Liang Zhang, and Zhidan Zhao, 2022, Compositional change from high-Mg to  
low-Mg magmatism at ca. 150 Ma in central Lhasa Terrane, Tibet: switching from  
advancing to retreating subduction of the Bangong Tethys: GSA Bulletin.

## Supplemental Material

### 1. ANALYTICAL METHODS

#### 1.1. Zircon trace elemental analyses and U-Pb dating

#### 1.2. In-situ zircon Hf isotope measurements

#### 1.3. Whole-rock geochemical analyses

### 2. DATA SETS AND FIGURES

**Table S1.** LA-ICP-MS zircon trace element results for intrusive rocks from the  
Zhegu, Wengmunong, and Dulu plutons in the central Lhasa subterrane.

**Table S2.** LA-ICP-MS zircon U-Pb dating results for intrusive rocks from the  
Zhegu, Wengmunong, and Dulu plutons in the central Lhasa subterrane.

**Table S3.** In-situ zircon Hf isotopes analyzed by LA-MC-ICP-MS for intrusive  
rocks from the Zhegu, Wengmunong, and Dulu plutons in the central Lhasa  
subterrane.

**Table S4.** Whole-rock major and trace element concentrations for intrusive rocks  
from the Zhegu, Wengmunong, and Dulu plutons in the central Lhasa subterrane, and  
for duplicate samples and measured USGS standards.

**Table S5.** Compiled GPS positions and zircon U-Pb age data of the magmatic  
rocks from the central and southern Lhasa subterrane.

**Table S6.** Compiled GPS positions and detrital zircon U-Pb age and Hf isotopic  
data of sedimentary rocks from Mesozoic strata in the central and southern Lhasa  
subterrane.

**Figure S1.** Whole-rock  $\text{TiO}_2$ ,  $\text{Al}_2\text{O}_3$ ,  $\text{TFe}_2\text{O}_3$ ,  $\text{MgO}$ ,  $\text{CaO}$ , and  $\text{Na}_2\text{O}$  versus  $\text{SiO}_2$   
diagrams (A–F) for intrusive rocks from the Zhegu, Wengmunong, and Dulu plutons  
in the central Lhasa subterrane.

**Figure S2.** (A) Whole-rock  $\varepsilon_{\text{Nd}}(t)$  and (B) whole-rock  $(^{87}\text{Sr}/^{86}\text{Sr})_i$  versus zircon U-Pb age diagrams for Middle Jurassic-Early Cretaceous igneous rocks in the central Lhasa subterrane.

**Figure S3.** Ba/Th versus La/Sm (A) and Zr and Ba versus  $\text{SiO}_2$  (B–C) diagrams for Middle-Late Jurassic igneous rocks in the central Lhasa subterrane.

### 3. REFERENCE CITED

#### 1. ANALYTICAL METHODS

##### 1.1. Zircon trace elemental analyses and U-Pb dating

Eight samples were selected for zircon U-Pb dating. U-Th-Pb isotopes and trace elements of zircons were analyzed synchronously using an Agilent 7900 ICP-MS system combined with a NewWave 193<sup>UC</sup> excimer laser ablation (LA) system at the Milma Lab, China University of Geosciences, Beijing (CUGB). The laser denudation diameter of 35  $\mu\text{m}$ , the repetition rate of 6–8 Hz, and the energy density of 4–6  $\text{J}/\text{cm}^2$  were used for all spot analyses. Each spot analysis consisted of background acquisition of 18 s (gas blank), sample integration of 50 s, and a delay of 30 s to washout and prepare for the next spot analysis. We use zircon 91,500 ([Wiedenbeck et al., 1995](#)) and glass NIST SRM 610 as external standards to correct U-Pb age and trace elements, respectively. Zircon GJ-1 ([Jackson et al., 2004](#)) and Plešovice ([Sláma et al., 2008](#)) were used as monitor standards to examine the instrument state and the accuracy of the calibration. Detailed setting parameters and conditions for the LA system and ICP-MS equipment are consistent with the introductions in [Zhang et al. \(2019\)](#). The ICPMSDataCal ([Liu et al., 2010](#)), a Microsoft software, was applied to conduct off-line analyses of data. The common Pb correction, concordia diagram plotting, and weighted mean age calculation were carried out by using the ComPbCorr#3.17 ([Andersen, 2002](#)) and ISOPLOT (ver 3.0) ([Ludwig, 2003](#)), respectively. The concordance degree was calculated by the ratio of  $^{207}\text{Pb}/^{235}\text{U}$  and  $^{208}\text{Pb}/^{238}\text{U}$  ages and data with discordance larger than 10% were eliminated. Uncertainties for individual analyses are reported at 1-sigma and mean  $^{206}\text{Pb}/^{238}\text{U}$  analyses at 2-sigma.

59

## 60 **1.2. In-situ zircon Hf isotope measurements**

61 Zircon in-situ Hf isotopes were analyzed on the same zircon grains previously  
62 analyzed for U-Pb dating at Milma Lab, CUGB by using multi-collector  
63 (MC)-ICP-MS attached to a New Wave 193<sup>UC</sup> excimer LA system. During analysis,  
64 the spot size of 35  $\mu\text{m}$ , the laser repetition rate of 6 Hz, and the energy density of 3–4  
65  $\text{J}/\text{cm}^2$  were applied for all spot analyses. Each analysis includes background  
66 acquisition of 50 s, data acquisition of 50 s, and washout of 5 s. The detailed setting  
67 parameters and analytical procedures were described by [Zhang et al. \(2019\)](#). Zircon  
68 91500 ([Blichert-Toft, 2008](#)) was analyzed as the external standard for correcting mass  
69 discrimination, and zircon standards GJ-1([Jackson et al., 2004](#)) and Plesovice ([Sláma](#)  
70 [et al., 2008](#)) were used as unknown samples. Raw data were processed by using Iolite  
71 software ([Paton et al., 2011](#)). We calculate zircon  $\epsilon_{\text{Hf}}(t)$  values reported in this study  
72 and literature using the Chondrite Lu-Hf isotopic values ( $^{176}\text{Lu}/^{177}\text{Hf} = 0.0336$  and  
73  $^{176}\text{Hf}/^{177}\text{Hf} = 0.282785$ ; [Bouvier et al., 2008](#)).

74

## 75 **1.3. Whole-rock geochemical analysis**

76 Twenty-five samples were analyzed for major and trace element compositions.  
77 Whole-rock major element oxides (wt.%) were measured on fused glass discs, using  
78 X-ray fluorescence (Axios MAX) at Chinese Academy of Sciences, Beijing, China.  
79 The analytical uncertainties are generally better than 5% for all elements. Whole-rock  
80 trace elements were measured using Agilent 7700e ICP-MS at the Wuhan  
81 SampleSolution Analytical Technology Co., Ltd., Wuhan, China. Multiple-reference  
82 materials, including AGV-2, BHVO-2, BCR-2, and RGM-2, were used to calibrate  
83 the elemental concentrations of samples. The accuracy is commonly better than 10%.

84

## 85 **2. DATA SETS AND FIGURES**

86 **Tables S1–S6 are listed in an Excel file**

87

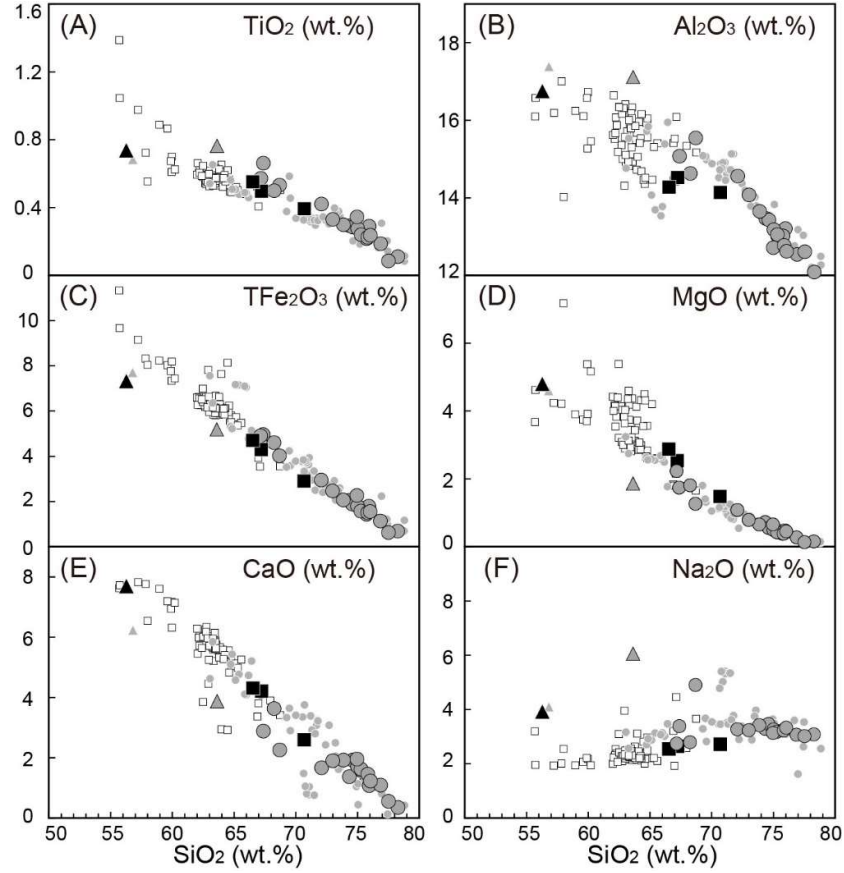

88

89 **Figure S1.** (A–F) Whole-rock  $\text{TiO}_2$ ,  $\text{Al}_2\text{O}_3$ ,  $\text{TFe}_2\text{O}_3$ ,  $\text{MgO}$ ,  $\text{CaO}$ , and  $\text{Na}_2\text{O}$  versus  
90  $\text{SiO}_2$  diagrams for intrusive rocks from the Zhegu, Wengmunong, and Dulu plutons in  
91 the central Lhasa subterrane. The sources of literature data are the same as in Figure 5.

92

93

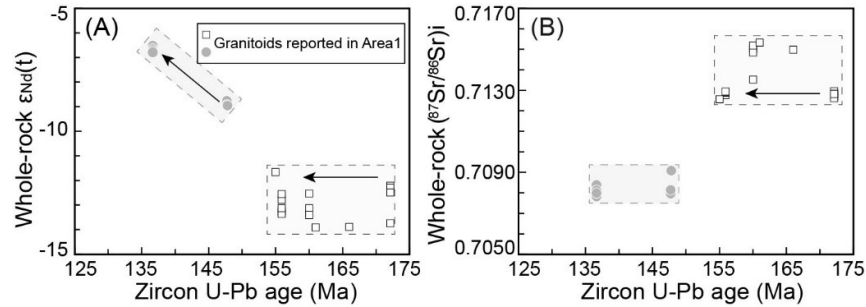

94

95 **Figure S2.** (A) Whole-rock  $\epsilon_{\text{Nd}}(t)$  and (B) whole-rock  $(^{87}\text{Sr}/^{86}\text{Sr})_i$  values versus zircon  
96 U-Pb ages diagrams for Middle Jurassic-Early Cretaceous igneous rocks in the central  
97 Lhasa subterrane. Literature data are from Wang et al. (2017), Liu et al. (2018), Zheng  
98 et al. (2018), Wu et al. (2021), and Tong et al. (2022).

99

100

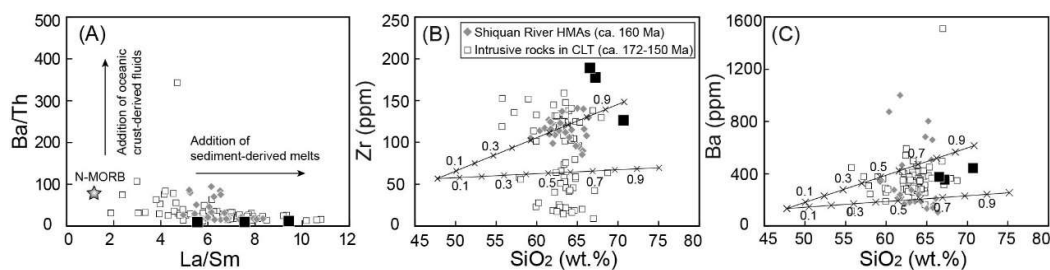

101

102 **Figure S3.** Ba/Th versus La/Sm (A) and Zr and Ba versus SiO<sub>2</sub> (B–C) diagrams for  
 103 Middle-Late Jurassic igneous rocks in the central Lhasa subterrane. MORB = mid  
 104 ocean ridge basalt. N-MORB = normal MORB. The data for N-MORB and Shiquan  
 105 River high-Mg andesites (HMAs) are from Gale et al. (2013) and Liu et al. (2018),  
 106 respectively. Data sources of intrusive rocks (172–150 Ma) are listed in Table S5.

107

### 108 3. REFERENCE CITED

- 109 Andersen, T., 2002, Correction of common lead in U-Pb analyses that do not report  
 110 <sup>204</sup>Pb: Chemical Geology, v. 192, p. 59–79,  
 111 [https://doi.org/10.1016/s0009-2541\(02\)00195-x](https://doi.org/10.1016/s0009-2541(02)00195-x).  
 112 Blichert-Toft, J., 2008, The Hf isotopic composition of zircon reference material  
 113 91500: Chemical Geology, v. 253, p. 252–257,  
 114 <https://doi.org/10.1016/j.chemgeo.2008.05.014>.  
 115 Bouvier, A., Vervoort, J.D., and Patchett, P.J., 2008, The Lu-Hf and Sm-Nd isotopic  
 116 composition of CHUR: Constraints from unequilibrated chondrites and  
 117 implications for the bulk composition of terrestrial planets: Earth and Planetary  
 118 Science Letters, v. 273, p. 48–57, <https://doi.org/10.1016/j.epsl.2008.06.010>.  
 119 Gale, A., Dalton, C.A., Langmuir, C.H., Su, Y., and Schilling, J.-G., 2013, The mean  
 120 composition of ocean ridge basalts: Geochemistry, Geophysics, Geosystems, v.  
 121 14, p. 489–518, <https://doi.org/10.1029/2012gc004334>.  
 122 Jackson, S.E., Pearson, N.J., Griffin, W.L., and Belousova, E.A., 2004, The  
 123 application of laser ablation-inductively coupled plasma-mass spectrometry to in  
 124 situ U–Pb zircon geochronology: Chemical Geology, v. 211, p. 47–69,

125 <https://doi.org/10.1016/j.chemgeo.2004.06.017>.  
 126 Liu, W.-L., Huang, Q.-T., Gu, M., Zhong, Y., Zhou, R., Gu, X.-D., Zheng, H., Liu,  
 127 J.-N., Lu, X.-X., and Xia, B., 2018, Origin and tectonic implications of the  
 128 Shiquanhe high-Mg andesite, western Bangong suture, Tibet: *Gondwana*  
 129 *Research*, v. 60, p. 1–14, <https://doi.org/10.1016/j.gr.2018.03.017>.  
 130 Liu, Y., Gao, S., Hu, Z., Gao, C., Zong, K., and Wang, D., 2010, Continental and  
 131 Oceanic Crust Recycling-induced Melt-Peridotite Interactions in the Trans-North  
 132 China Orogen: U-Pb Dating, Hf Isotopes and Trace Elements in Zircons from  
 133 Mantle Xenoliths: *Journal of Petrology*, v. 51, p. 537–571,  
 134 <https://doi.org/10.1093/petrology/egp082>.  
 135 Ludwig, K.R., 2003, *ISOPLOT 3.00: A geochronological toolkit for Microsoft Excel*,  
 136 Berkeley, CA, Berkeley Geochronology Center.  
 137 Paton, C., Hellstrom, J., Paul, B., Woodhead, J., and Hergt, J., 2011, Iolite: Freeware  
 138 for the visualisation and processing of mass spectrometric data: *Journal of*  
 139 *Analytical Atomic Spectrometry*, v. 26, p. 2508–2518,  
 140 <https://doi.org/10.1039/c1ja10172b>.  
 141 Sláma, J., Košler, J., Condon, D.J., Crowley, J.L., Gerdes, A., Hanchar, J.M.,  
 142 Horstwood, M.S.A., Morris, G.A., Nasdala, L., Norberg, N., Schaltegger, U.,  
 143 Schoene, B., Tubrett, M.N., and Whitehouse, M.J., 2008, Plešovice zircon — A  
 144 new natural reference material for U-Pb and Hf isotopic microanalysis: *Chemical*  
 145 *Geology*, v. 249, p. 1–35, <https://doi.org/10.1016/j.chemgeo.2007.11.005>.  
 146 Tong, X., Yan, J., Zhao, Z., Niu, Y., Qi, N., Shi, Q., Liu, D., Wang, Q., Zhang, L.-L.,  
 147 Dong, G., and Zhu, D.-C., 2022, Middle-Late Jurassic magmatism in the west  
 148 central Lhasa subterrane, Tibet: *Petrology, zircon chronology, elemental and*  
 149 *Sr-Nd-Pb-Hf-Mg isotopic geochemistry: Lithos*, v. 408–409, no. 106549,  
 150 <https://doi.org/10.1016/j.lithos.2021.106549>.  
 151 Wang, Y., Tang, J., Wang, L., Duan, J., Danzhen, W., Li, S., and Li, Z., 2017,  
 152 Petrogenesis of Jurassic granitoids in the west central Lhasa subterrane, Tibet,  
 153 China: the Geji example: *International Geology Review*, v. 60, p. 1155–1171,  
 154 <https://doi.org/10.1080/00206814.2017.1375438>.

155 Wiedenbeck, M., Allé, P., Corfu, F., Griffin, W.L., Meier, M., Oberli, F., Von Quadt,  
 156 A., Roddick, J.C. Spiegel, W., 1995, Three natural zircon standards for U-Th-Pb,  
 157 Lu-Hf, trace element and REE analyses: Geostandards and Geoanalytical  
 158 Research, v. 19, p. 1–23, <https://doi.org/10.1111/j.1751-908X.1995.tb00147.x>.  
 159 Wu, H., Fan, J.-J., Jiang, Z.-Q., Hao, Y.-J., and Luo, A.-B., 2021, Late Jurassic-Early  
 160 Cretaceous magmatic activity in the Central Lhasa Terrane: Petrogenesis and  
 161 implications for the initial subduction of the Slainajap oceanic lithosphere:  
 162 Palaeogeography, Palaeoclimatology, Palaeoecology, v. 573, no. 110438,  
 163 <https://doi.org/10.1016/j.palaeo.2021.110438>.  
 164 Zhang, L.-L., Zhu, D.-C., Wang, Q., Zhao, Z.-D., Liu, D., and Xie, J.-C., 2019, Late  
 165 Cretaceous volcanic rocks in the Sangri area, southern Lhasa Terrane, Tibet:  
 166 Evidence for oceanic ridge subduction: Lithos, v. 326–327, p. 144–157,  
 167 <https://doi.org/10.1016/j.lithos.2018.12.023>.  
 168 Zheng, H., Huang, Q.T., Cai, Z.R., Zhang, K.J., Liu, H.C., Cheng, C., Lu, L.J., Yang,  
 169 P., Yu, S.R., and Yang, G., 2018, Early Cretaceous arc granitoids from the central  
 170 Lhasa subterrane: Production of the northward subduction of Yarlung Zangbo  
 171 Neo-Tethyan Ocean?: Geological Journal, v. 54, p. 4001–4013,  
 172 <https://doi.org/10.1002/gj.3399>.
